# Supplementary material for: Enhanced performance of bimetallic PtCo/MCM-41 catalysts for glycerol oxidation in base-free medium
Source: Royal Society of Chemistry journal article supplement (doi:10.1039/c9cy01154d), 2019-01-01
Supplement: c9cy01154d1.pdf [file c9cy01154d1.pdf]

## Supporting Information

### **Enhanced performances of bimetallic PtCo/MCM-41 catalysts for glycerol oxidation in base-free medium**

Hao Yan, Hansong Qin, Wei Liang, Xin Jin, Yashuang Zhang, Xiang Feng, Yibin Liu\*,

Xiaobo Chen, Chaohe Yang\*

*State Key Laboratory of Heavy Oil Processing, China University of Petroleum,*

*Qingdao 266580, China*

\* To whom correspondence should be addressed: E-mail: liuyibin@upc.edu.cn

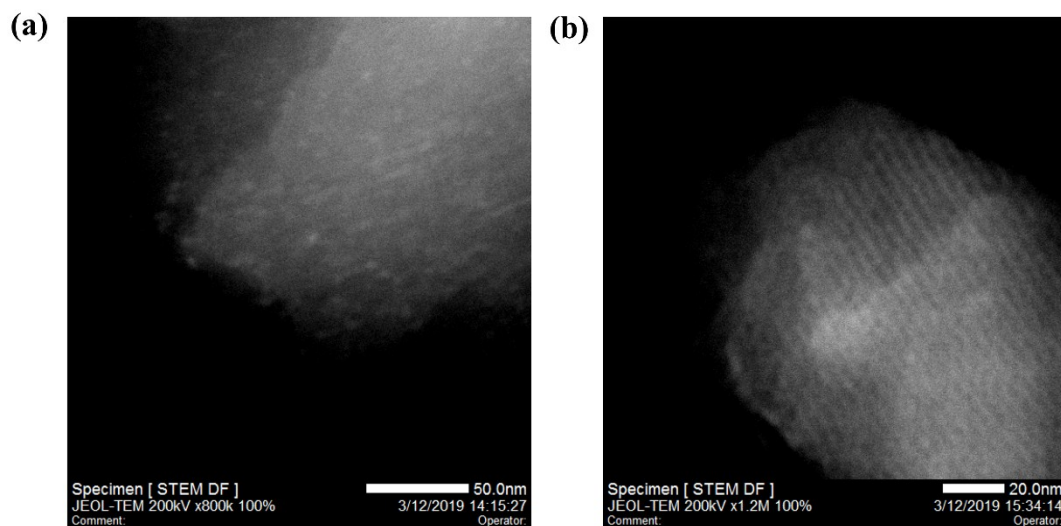

Figure S1. HAADF-STEM images and particle size distribution of (a) Co/MCM-41 (IM) and (b) Co/MCM-41 (200) samples

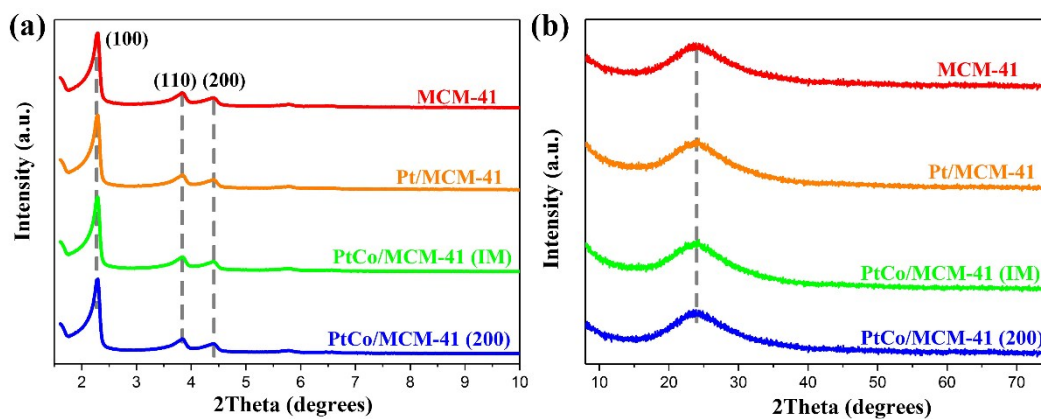

Figure S2. XRD patterns of (a) small-angle and (b) high-angle.

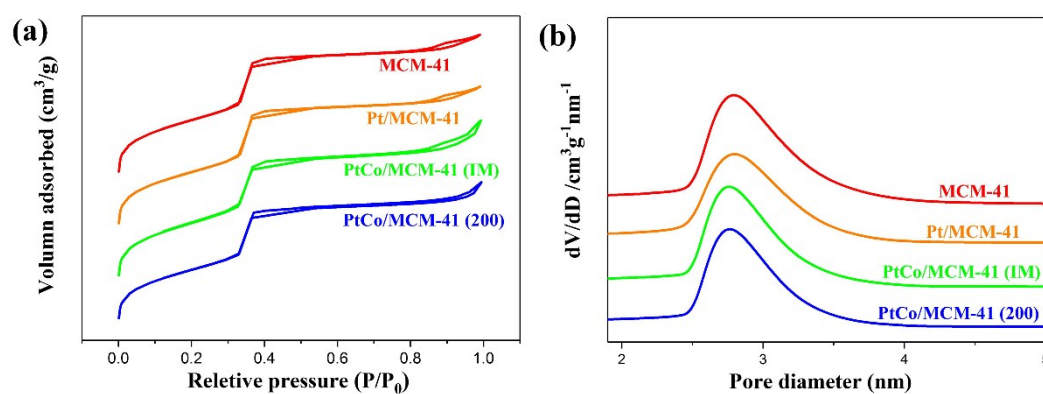

Figure S3. N<sub>2</sub>-physorption isotherms (a) and pore size distribution (b) of MCM-41, Pt/MCM-41,

PtCo/MCM-41 (IM) and (b) PtCo/MCM-41 (200) catalyst.

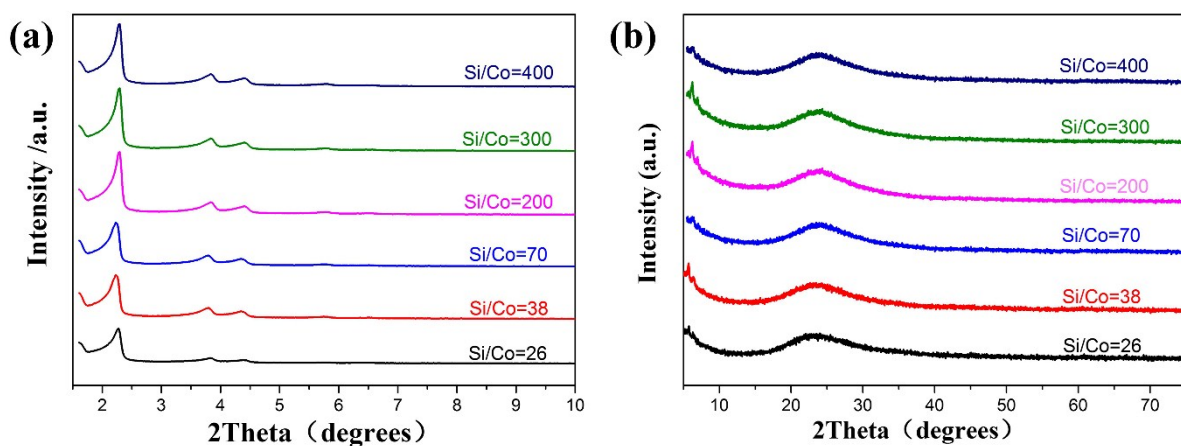

Figure S4. XRD patterns of Co/MCM-41 samples.

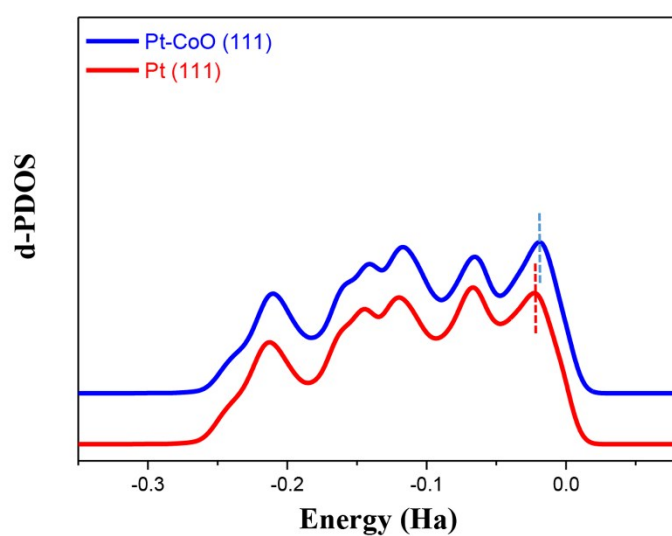

Figure S5. d-partial density of states of Pt (111) and Pt-CoO.

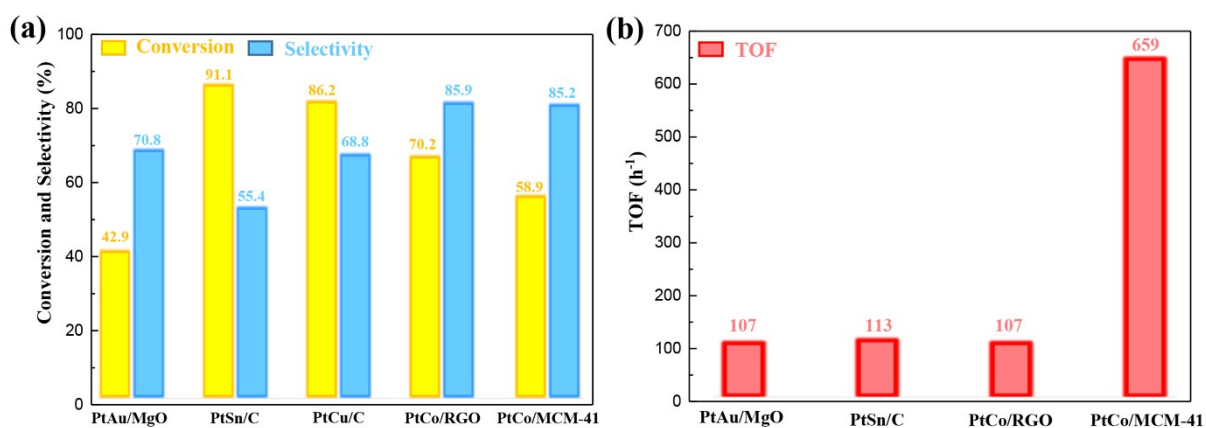

Figure S6. Comparison of PtCo/MCM-41 (200) catalyst with previous work for glycerol oxidation: (a)

Conversion and selectivity and (b) TOF (Conditions: T: 60-80 °C,  $\text{P}_{\text{O}_2}$ : 0.1-1 MPa).

## The calculation process of ratio of Si/Co in the Co/MCM-41(200) sample

The ratio of Si to Co is calculated according to the molar ratio of the feed stock. For example, Co/MCM-41 (200) sample means that the amount of Co added is 1/200 of the molar number of Si added. The calculation formula is as follows:

**The addition amount of Co:**

$$\frac{14.0 \text{ (mL)} \cdot 0.9346 \text{ (g/cm}^3\text{)}}{208.33 \cdot 200} \cdot 291.03 = 0.09 \text{ g [Co(NO}_3\text{)}_2 \cdot 6\text{H}_2\text{O]}$$

14.0 mL is the addition amount of TEOS. 0.9346 and 208.33 are the density and relative molecular weight of TEOS, respectively. 291.03 is the relative molecular weight of  $\text{Co(NO}_3\text{)}_2 \cdot 6\text{H}_2\text{O}$ .

Table S1. Physicochemical properties of Co/MCM-41 samples

| Sample           | BET surface area<br>(m <sup>2</sup> /g) | Pore volume<br>(cm <sup>3</sup> /g) |
|------------------|-----------------------------------------|-------------------------------------|
| PtCo/MCM-41(26)  | 274.1                                   | 0.1                                 |
| PtCo/MCM-41(38)  | 322.5                                   | 0.2                                 |
| PtCo/MCM-41(70)  | 314.7                                   | 0.2                                 |
| PtCo/MCM-41(200) | 474.4                                   | 0.3                                 |
| PtCo/MCM-41(300) | 585.39                                  | 0.5                                 |
| PtCo/MCM-41(400) | 586.25                                  | 0.5                                 |
| Pt/MCM-41        | 663.2                                   | 0.6                                 |

Table S2. Oxidation of glycerol over PtCo/MCM-41 catalyst<sup>a</sup>

| Catalyst          | Loading (wt%) <sup>b</sup> |      | Disper<br>sion<br>(%) <sup>c</sup> | Selectivity (%) <sup>d</sup> |       |       |      |       | Conversati<br>on (%) | TOF <sup>e</sup><br>(h <sup>-1</sup> ) |
|-------------------|----------------------------|------|------------------------------------|------------------------------|-------|-------|------|-------|----------------------|----------------------------------------|
|                   | Pt                         | Co   |                                    | GLYA<br>D                    | GLYA  | DHA   | TA   | GLYOA |                      |                                        |
| PtCo/MCM-41 (26)  | 0.51                       | 3.25 | 64.0                               | 10.97                        | 75.06 | 14.78 | 0.1  | 2.62  | 44.59                | 376.8                                  |
| PtCo/MCM-41 (38)  | 0.57                       | 2.15 | 69.2                               | 9.68                         | 76.66 | 13.65 | 0.08 | 2.20  | 45.99                | 395.6                                  |
| PtCo/MCM-41 (70)  | 0.52                       | 1.39 | 64.0                               | 8.73                         | 78.45 | 13.29 | 0.07 | 2.43  | 48.95                | 527.5                                  |
| PtCo/MCM-41 (200) | 0.58                       | 0.56 | 61.0                               | 8.16                         | 78.96 | 12.41 | 0.09 | 1.19  | 55.37                | 658.6                                  |
| PtCo/MCM-41 (300) | 0.54                       | 0.32 | 60.6                               | 16.10                        | 67.41 | 13.60 | 0.00 | 0.00  | 51.54                | 635.8                                  |
| PtCo/MCM-41 (400) | 0.54                       | 0.15 | 52.7                               | 20.93                        | 66.26 | 13.37 | 0.00 | 0.00  | 42.26                | 469.6                                  |
| Pt/MCM-41         | 0.55                       | 0.00 | 57.3                               | 18.69                        | 62.75 | 16.41 | 0.00 | 0.00  | 33.33                | 248.5                                  |

a. Reaction conditions: 0.2 catalyst, 25 mL aqueous solution of glycerol (0.22 M), glycerol/Pt molar ration 530, 60°C, 1MPa O<sub>2</sub>, 8h

b. Determined by ICP-OES analysis.

c. Measured from TEM images.

d. Most of the rest of the products are CO<sub>2</sub>.

e. TOF was calculated as mole of glycerol molecules converted per mole of surface Pt atoms per hour. And the conversion was all less than 10% to ensure that the average reaction rate is equal to the instantaneous reaction rate.

Table S3. Catalyst properties and reaction conditions of PtCo/MCM-41 (200) catalyst with previous work for glycerol oxidation in base-free medium.

| Catalyst | Pt loading<br>(%) | Nanoparticle<br>size (nm) | Reaction conditions                                              |
|----------|-------------------|---------------------------|------------------------------------------------------------------|
| Pt/MCN-5 | 3.1               | 2.3                       | glycerol/Pt molar ratio =750, 60°C, 0.3 MPaO <sub>2</sub> , 4 h  |
| PtAu/MgO | 0.75              | 2.0                       | glycerol/Pt molar ratio =1000, 60°C, 0.3 MPaO <sub>2</sub> , 4 h |
| PtSn/AC  | 2.0               | 1.8                       | glycerol/Pt molar ratio =500, 60°C, oxygen (15 mL/min), 8 h      |

---

|             |     |     |                                                                |
|-------------|-----|-----|----------------------------------------------------------------|
| PtCu/AC     | 5.0 | 5.0 | glycerol/Pt molar ratio =420, 60°C, oxygen (150 mL/min) , 6 h  |
| PtCo/RGO    | 9.6 | 2.4 | glycerol/Pt molar ratio =420, 60°C, oxygen (30 mL/min) , 3 h   |
| PtCo/MCM-41 | 0.6 | 1.9 | glycerol/Pt molar ratio =1000, 60°C, 1 MPaO <sub>2</sub> , 8 h |

---
